# Supplementary material for: The Global Spectra-Trait Initiative: A database of paired leaf spectroscopy and functional traits associated with leaf photosynthetic capacity
Source: Copernicus journal article supplement (doi:10.5194/essd-2025-213), 2025-05-21
Supplement: Supplementary file [file essd-2025-213-RC1-supplement.pdf]

Reviewer Report: Manuscript essd-2025-213

Title: The Global Spectra-Trait Initiative: A database of paired leaf spectroscopy and functional traits associated with leaf photosynthetic capacity

Major Strengths

**High Scientific Value:** Establishes the first open-access global database (GSTI) systematically integrating leaf spectroscopy and photosynthetic functional traits, addressing a critical data gap for cross-species/environment spectral model development.

**Methodological Standardization:** Provides unified data processing workflows (R scripts) and parameter-fitting standards (e.g., FvCB model), ensuring data comparability and reproducibility.

**Exceptional Data Scale:** Covers 41 sites, 397 species, and >7,500 observations—significantly exceeding existing similar efforts.

**FAIR Compliance:** Open data (GitHub/ESS-Dive) under CC-BY 4.0 aligns with modern scientific data-sharing practices.

---

Required Revisions: Scientific and Logical Issues

1. Contradiction in Methodological Description

Issue (Page 10):

Original text: "We considered the mesophyll conductance infinite, therefore estimates of  $V_{\text{cmax}25}$ ,  $J_{\text{max}25}$  and are 'apparent' values..."

Problem: The phrasing "considered" inaccurately implies an active choice, while the FvCB model inherently assumes infinite  $g_m$ .

Revision:

"The FvCB model intrinsically assumes infinite mesophyll conductance; thus, estimated parameters represent apparent values based on intercellular  $\text{CO}_2$  concentration ( $C_i$ )."

2. Inadequate Discussion of Data Representation Bias

Issue (Pages 14–15, Fig. 5):

Data for temperate coniferous forests are minimal (32 observations, no full-range spectra), yet the text claims coverage of "temperate mixed broadleaf forests" without

highlighting this gap.

Africa is entirely unrepresented (e.g., savannas comprise ~11% of global vegetated area), potentially limiting model generalizability.

Revision: In Section 4.1 ("Data coverage"), quantify ecological significance of underrepresented biomes (e.g., African savannas, Mediterranean ecosystems) and assess impacts on model robustness.

### 3. Ambiguous Model Validation Protocol

Issue (Page 12):

PLSR validation uses "random selection of 80% for training and 20% for validation" but omits whether sampling was stratified by dataset. Global randomization risks data leakage if samples from the same dataset appear in both training/validation sets.

Revision: Clarify the sampling strategy (e.g., "stratified random sampling by source dataset") to prevent overestimation of model performance.

### 4. Missing Figure Citations

Issue (Page 16):

The description of trait correlations ("Figure 7 illustrates...") lacks a formal figure citation.

Revision: Insert "Figure 7" when first referenced:

"Figure 7 illustrates bivariate relationships between  $V_{\text{cmax}25}$  and other traits..."

---

### Language and Presentation Errors

Inconsistent Terminology (Page 6 vs. Table 1):

Text uses "leaf mass per area (LMA)", but Table 1 abbreviates it as "ALM".

Correction: Standardize to "LMA" throughout.

Ambiguous Units (Table 1):

"Wave\_XX: Reflectance at wavelength XX, percent"

Correction: Specify as "Reflectance (fraction, 0–1)" or "Reflectance (% , 0–100)".

Incorrect Subscript (Fig. 6 Caption):

"TPUs " → Correction: Use "TPU<sub>25</sub> " (consistent with text).

Typographical Error (Abstract):

"agricultrual" → Correction: "agricultural".

---

#### Additional Recommendations

**Data Quality Control:** Expand Section 2.2.6 to describe outlier handling (e.g., exclusion criteria) when `f.Check_data()` flags values outside expected ranges.

**Roadmap for C4/CAM Data:** In Section 4.1, specify plans/timelines to incorporate C4/CAM species (e.g., collaborations in progress).

**Citation Updates:** Replace preprint citations (e.g., Luo et al., 2024) with peer-reviewed versions where available, or label as "in review/preprint".

---

#### Decision

This work presents a valuable contribution to plant spectroscopy and functional ecology. However, revisions are required to address methodological clarity, data representativeness, and presentation consistency.

**Recommendation:** Minor Revision

---

Sincerely,

Invited Reviewer, ESSD
